# Supplementary material for: Relationship Between Gender and the Effectiveness of Montelukast: An Italian/Danish Register-Based Retrospective Cohort Study
Source: Front Pharmacol. 2018 Aug 2;9:844. doi: 10.3389/fphar.2018.00844 (PMC6083053; doi:10.3389/fphar.2018.00844)
Supplement: Supplementary file 1 [file Table_1.DOCX]

Supplementary Material

Relationship between gender and the effectiveness of montelukast: an Italian/Danish register-based retrospective cohort study

Maurizio Sessa1,2⸸ & Annamaria Mascolo2⸸, Bruno D’Agostino2, Antonio Casciotta3, Vincenzo D’Agostino3, Fausto De Michele4, Mario Polverino5, Giuseppe Spaziano2, Mikkel Porsborg Andersen6, Kristian Kragholm6, Francesco Rossi2, Christian Torp-Pedersen6,7 and Annalisa Capuano2.

1Department of Drug Design and Pharmacology, University of Copenhagen, Copenhagen, Denmark
2Department of Experimental Medicine, University of Campania “L. Vanvitelli”, Naples, Italy.
3Pharmaceutical Department, Local Health Unit Napoli Second, Napoli, Italy.
4Department of Pneumology, AORN A. Cardarelli, Naples, Italy.
5Department of Pneumology and Endoscopic Unit, Ospedale Scarlato, Scafati, Italy.
6Unit of Epidemiology and Biostatistics, Aalborg University Hospital, Aalborg, Denmark
7Department of Health Science and Technology, Aalborg University, Aalborg, Denmark.

⸸ These authors contributed equally and served as co-first authors.

*** Correspondence:**Maurizio Sessa
maurizio.sessa@sund.ku.dk

**Keywords: clinical epidemiology1; asthma2; humans3; pharmacoepidemiology4; pharmacology5; translational medical research6; montelukast7**

**Supplementary table 1**. Operative definition of outcomes.

| **Drugs** | **ATC† code** |
| --- | --- |
| *Long-term treatment for asthma*:  selective beta-2-adrenoreceptor agonists inhalants and oral – long acting, glucocorticoids, mast cell stabilizer, glucocorticoids + selective beta-2-adrenoreceptor agonists inhalants, and mast cell stabilizer + selective beta-2-adrenoreceptor agonists inhalants | R03AC18, R03AC13, R03AC12,R03CC12, R03BA01, R03BA05, R03BA02, R03BA08, R03BA03, R01AC07, R03BC03, R03BC01, R01AC01, R03AK07, R03AK06, R03AK04, R01AC51 |
| *Short acting selective beta-2-adrenoreceptor agonists* | R03AC04, R03AC05, R03AC03, R03AC02, R03CC03, R03CC02 |
| *Oral corticosteroids* | H02AB |

**†**ATC: Anatomical Therapeutic Classification
